1 **Sense-antisense gene overlap causes evolutionary retention of the few**  
2 **introns in *Giardia* genome and the implications**

3

4

5 Min Xue<sup>1,2</sup>, Bing Chen<sup>1</sup>, Qingqing Ye<sup>1</sup>, Jingru Shao<sup>1</sup>, Zhangxia Lyu<sup>1</sup>, Jianfan Wen<sup>1,\*</sup>

6

7 <sup>1</sup>State Key Laboratory of Genetic Resources and Evolution, Kunming Institute of  
8 Zoology, Chinese Academy of Sciences, Kunming, Yunnan 650223, China.

9 <sup>2</sup>Kunming College of Life Science, University of Chinese Academy of Sciences,  
10 Kunming, Yunnan 650204, China.

11

12

13 **\*Corresponding author:** Jianfan Wen, E-mail: wenjf@mail.kiz.ac.cn

14 E-mail for other authors:

15 Min Xue: xuemin@mail.kiz.ac.cn

16 Bing Chen: chenbing@mail.kiz.ac.cn

17 Qingqing Ye: yeqingqing@mail.kiz.ac.cn

18 Jingru Shao: shaojr@mail.kiz.ac.cn

19 Zhangxia Lyu: zhangxialv@outlook.com

20

21

22

23

24 **Abstract**

25 **Background:** It is widely accepted that the last eukaryotic common ancestor (LECA)  
26 and early eukaryotes were intron-rich and intron loss dominated subsequent evolution,  
27 thus the presence of only very few introns in some modern eukaryotes must be the  
28 consequence of massive loss. But it is striking that few eukaryotes were found to have  
29 completely lost introns. Despite extensive research, the causes of massive intron  
30 losses remain elusive, and actually the reverse question – how the few introns are  
31 retained under the pressure of loss is equally significant but was rarely studied, except  
32 that it was conjectured that the essential functions of some introns prevent their loss.  
33 The extremely few (eight) spliceosome-mediated cis-spliced introns in the relatively  
34 simple genome of *Giardia lamblia* provide an excellent opportunity to explore this  
35 question.

36 **Results:** Our investigation of the intron-containing genes and introns in *Giardia*  
37 found three types of intron distribution patterns: ancient intron in ancient gene,  
38 relatively new intron in ancient gene, and relatively new intron in relatively new gene,  
39 which can reflect to some extent the dynamic evolution of introns in *Giardia*. Not  
40 finding any special features or functional importance of these introns responsible for  
41 the retention, we noticed and experimentally verified that some intron-containing  
42 genes form sense-antisense gene pairs with functional genes on their complementary  
43 strands, and that the introns just reside in the overlapping regions.

44 **Conclusions:** In *Giardia*'s evolution, despite constant pressure of intron loss, intron  
45 gain can still occur in both ancient and newly-evolved genes, but only a few introns  
46 have been retained; the evolutionary retention of introns is most likely not due to the  
47 functional constraint of the introns themselves but the causes outside of introns, such  
48 as the constraints imposed by other genomic functional elements overlapping with the

49 introns. These findings can not only provide some clues to find new genomic  
50 functional elements -- in the areas overlapping with introns, but suggest that  
51 “functional constraint” of introns may not be necessarily directly associated with  
52 intron loss and gain, or that the real functions or the way of functioning of introns are  
53 probably still outside of our current knowledge.

54

55 **Keywords:** Evolutionary retention of introns, Gene overlap, Intron evolution,  
56 Genome evolution, *Giardia lamblia*.

57

## 58 **Background**

59 Spliceosomal introns are a common feature of all eukaryotic nuclear genomes, but  
60 their number and density in a genome vary dramatically among different species [1, 2],  
61 ranging from less than 0.5 intron/gene in some protists such as the Microsporidian  
62 *Encephalitozoon* species [3] and *Cyanidioschyzon merolae* [4] to over 18 per gene in  
63 *Symbiodinium minutum* [5] (even larger than those of most mammals, which is  
64 generally over eight/gene [6]). Accumulating evidence suggests that the LECA and  
65 early eukaryotes were relatively intron rich, with subsequent genome evolution  
66 dominated by intron loss, and thus those contemporary eukaryotes with remarkably  
67 few introns must have experienced massive intron loss secondarily [7-9]. But,  
68 interestingly, no eukaryotes with sequenced genomes so far have been found to have  
69 completely lost their introns except the two Microsporidia species, *Nematocida parisii*  
70 and *Nematocida* sp1[10].

71 Unfortunately why introns were lost, especially massively lost in some eukaryotes,

72 remains obscure despite extensive research [11, 12]. Obviously, the reverse question  
73 -- how introns, especially the few ones in intron-poor eukaryotes, can be retained  
74 under the pressure of loss is equally important, but it was rarely carefully studied.  
75 Although some authors thought that the reason for the retention of introns in genomes  
76 is likely due to the essential functions of these introns [13-15], this ‘functional  
77 constraint’ scenario – “only the introns with important functions can get rid of the fate  
78 of being lost” lacks evidence that the lost introns are all useless or less useful than the  
79 retained ones in any eukaryotes, and moreover, actually the functions of introns are  
80 still far from being well understood [16]. Therefore, the investigation of the  
81 evolutionary retention of intron might be helpful not only to answering the question  
82 about intron loss but also to understanding the function and evolution of introns.

83 *Giardia lamblia* is a parasitic protozoan belonging to Diplomonadida (Excavata). It  
84 has a very minimalistic genome, compact in structure and content [17], and only eight  
85 spliceosomal introns were found in its genome [17-22]. Thus it can be speculated that  
86 this organism must have undergone massive intron loss, with very few left in the  
87 genome. Therefore, this organism may provide an excellent opportunity for exploring  
88 how the few introns were retained. In the present work, by investigating the  
89 intron-containing genes and the few introns of *Giardia*, besides finding the  
90 distribution patterns that can reflect the dynamic evolution of intron in *Giardia*, we  
91 observed and experimentally confirmed an interesting phenomenon that  
92 sense-antisense (SAS) gene overlaps appear in the areas of some introns, and thus  
93 “overlap constraint” might be at least one of the causes for preventing introns from

94 being lost, though it is uncertain whether the other retained introns also overlap with  
95 any unknown genomic functional elements yet. The implications of these findings for  
96 intron evolution and function are discussed.

97

## 98 **Results**

### 99 **Characteristics of the intron-containing genes and their introns in *Giardia*** 100 **genomes**

101 In the genome database of *Giardia*, GiardiaDB, four of the eight *Giardia*  
102 intron-containing genes are annotated to code proteins with sequence similarity to  
103 known proteins, and the other four to code hypothetical proteins. Our investigation  
104 (mainly by sequence comparative analysis) indicated that: 1) the former four  
105 intron-containing genes are all common eukaryotic-conserved genes, which are most  
106 likely vertically inherited from the LECA and thus are very ‘ancient’, while the latter  
107 four are all *Giardia*-specific genes (not found in other eukaryotes including other  
108 Excavata species), which thus most likely emerged after the divergence of *Giardia*  
109 from other Excavata and thus are ‘relatively new’ genes compared with the ‘ancient’  
110 ones above; 2) the introns in the three (GL50803-15604, GL50803-15124,  
111 GL50803-17244) of the four ancient genes are eukaryotic-conserved (Additional file  
112 1), and thus they are ‘ancient’ introns in ancient genes, while the intron in the other  
113 one ancient gene (GL50803-27266) is a *Giardia*-specific intron (not found in other  
114 eukaryotes including other Excavata species), and thus this intron most likely  
115 emerged after the divergence of *Giardia* from other Excavata and is a ‘relatively new’

116 intron in an ancient gene; 3) all four *Giardia*-specific ('relatively new')  
117 intron-containing genes (GL50803-37070, GL50803-35332, GL50803-15525 and  
118 GL50803- 86945), which account for only about 0.6 percent of all the ~700  
119 *Giardia*-specific protein-coding genes in the genome[17], each contain an  
120 *Giardia*-specific intron (not found in other eukaryotes including other Excavata  
121 species), and thus the four introns all are 'relatively new' introns in 'relatively new'  
122 genes (Table 1).

123 These observations suggest that: 1) while *Giardia* massively lost its introns, new  
124 introns also arose in both the ancient and relatively newly evolved genes; 2) the  
125 pressure of intron loss seems to constantly exist in the whole evolutionary process of  
126 *Giardia*, but only a few of both the ancient and newly-emerged introns have been  
127 retained in the genome.

128 To find the reason why these few introns can be retained in *Giardia* genome under  
129 strong pressure of loss, we investigated the characteristics of these introns in many  
130 aspects. It had been shown that seven of the eight *Giardia* introns are bounded by  
131 canonical GT-AG splice signals, only one, the [2Fe-2S] ferredoxin (GL50803-27266)  
132 intron, has a noncanonical splice signal CT-AG [19]. The sizes of the eight introns are  
133 all small (most of them are less than 40 bp long and are not the multiple of three) and  
134 do not have any conserved sequence motifs. Our further analysis predicted no special  
135 secondary structures that would be able to form in these introns. Besides, our survey  
136 also showed that there were not any reports about alternative splicing of the two  
137 introns in genes GL50803-15525 and GL50803-86945 [18, 22]. Taken together, these

138 results suggest that the retention of the few introns seems to be neither due to the  
139 structural features nor necessarily due to the functional importance of these introns.

140 Interestingly, on the complementary strands, we found that two intron-containing  
141 genes, GL50803-17244 (ribosomal protein L7a gene) and GL50803-37070 (a  
142 “hypothetical protein” gene), each have an antisense gene, GL50803-20429 and  
143 GL50803-28204, which are just annotated as “hypothetical protein” and “unspecified  
144 product” in the genome database, respectively. That is, the two intron-containing  
145 genes and their antisense gene form SAS gene pairs. We thought this phenomenon  
146 might be related to the intron retention. Nevertheless, the two anti-sense genes need to  
147 be further verified, and the details of the overlaps with their sense genes also need to  
148 be analyzed in detail.

#### 149 **Verification of the antisense genes**

150 The strand-specific RT-PCR of the two antisense genes, GL50803-28204 and  
151 GL50803-20429, generated two products with the expected lengths of 172 and 288 bp,  
152 respectively. The sequencing further confirmed that the two products just seem to be  
153 transcribed from the opposite direction of the two sense (intron-containing) genes,  
154 GL50803-37070 and GL50803-17244, respectively, and the two introns are just  
155 located within the two overlapping regions of the two SAS gene pairs, respectively  
156 (Figure 1).

157 The RACE of the two antisense genes generated a 1232 bp product for  
158 GL50803-28204 and a 1177 bp product for GL50803-20429. After sequencing and  
159 comparing with their corresponding genomic DNA sequences in the GiardiaDB

160 database, we found the two antisense genes contain no introns, especially in the  
161 regions corresponding to the two introns of the sense genes. But the software ORF  
162 Finder predicted that the largest ORFs of the two antisense genes are only 264 bp for  
163 GL50803-28204 and 363 bp for GL50803-20429, and moreover, no proteins  
164 homologous to the putative proteins coded by the two largest ORFs could be found in  
165 other organisms including *Giardia's* close relative *Spiroucleus* in GenBank.  
166 Therefore, the two antisense genes have transcriptional activity and are most likely  
167 *Giardia*-specific non-coding genes.

## 168 **Discussion**

169 To investigate the reasons for the evolutionary retention of the few introns in the  
170 eukaryotes having undergone massive intron loss, we chose the extremely intron-poor  
171 eukaryote *Giardia* as the study object. When investigating the characteristics  
172 (including distribution patterns) of the eight intron-containing genes and their  
173 corresponding introns in *Giardia* genome, we found that in spite of the massive loss  
174 of introns, intron gain also occurred in both *Giardia's* ancient and relatively  
175 newly-evolved genes; it turns out that the selective pressure of intron loss seems to  
176 constantly exist in the whole evolutionary course of *Giardia*, but a few of both the  
177 ancient and the newly-emerged introns have been retained in modern *Giardia*.

178 To explore how these few introns can be retained under the constant strong pressure  
179 of loss. First, we investigated whether there exist some features in these few  
180 intron-containing genes and the introns probably responsible for the retention, but  
181 failed to find any special regularities or unusualnesses in many aspects such as



182 splicing signal, intron size and secondary structure, and alterative splicing. This  
183 suggests that there are neither any special structural features nor necessarily any  
184 functional importance of introns responsible for the intron retention. This is consistent  
185 with the fact that so many introns, at least part of which definitely possesses important  
186 functions, have been lost in intron-poor eukaryotes like *Giardia*. Thus, the reasons for  
187 the retention might lie outside the intron-containing genes and the introns themselves.

188 Interestingly, we noticed that on the complementary strands of two of the eight  
189 intron-containing genes, GL50803-37070 and GL50803-17244, there exist  
190 correspondingly two anti-sense genes, GL50803-28204 and GL50803-20429, though  
191 they are just annotated as “product unknown” in GiardiaDB. By strand-specific  
192 RT-PCR, RACE and sequencing, we got the transcripts and sequences of the two  
193 genes and found they both have no introns. Thus the two anti-sense genes have been  
194 verified to be really genes that are actively transcribed. And actually the anti-sense  
195 gene GL50803-20429 has been reported to be a mRNA gene being expressed during  
196 excystation and encystation, and in trophozoites but not cysts [23]. As for the other  
197 anti-sense gene GL50803-28204, it has a quite short putative ORF but has no  
198 homologs in other organisms including *Spironucleus*. Although the corresponding  
199 DNA sequence regions in the four other *G. lamblia* isolates (DH, P15, GS and GS-B)  
200 with genomic data exhibit significant similarities ( $\geq 83.9\%$  similarity) to those of the  
201 two anti-sense genes, there are not any annotations and transcriptome information  
202 about those regions. Besides, the total RNA were processed using Poly(A)  
203 Polymerase to add a poly(A) tail at the 3'ends before we performed rapid

204 amplification of their cDNA 3'ends, thus from the experiment we still did not know  
205 whether the transcripts of GL50803-28204 are polyadenylated or not, namely, mRNA  
206 or not. Therefore, we can only conjecture that the two anti-sense genes are either  
207 non-protein-coding genes or *Giardia*-specific protein-coding genes. Considering that  
208 many identified non-coding RNAs in *Giardia* overlap with protein-coding genes on  
209 the antisense strands [24], the antisense gene might also be noncoding RNA gene. But  
210 there is still no tangible evidence for what the two genes are despite our lots of  
211 experimental efforts (not shown) to identify them. Whatever the antisense genes code  
212 for, our work showed that they are functional genes and form SAS gene overlap with  
213 their intron-containing sense genes, and that the introns just reside in the overlap  
214 regions. Considering that the gene sequence mutation (especially deletion) cannot  
215 occur randomly, the antisense genes must have imposed the restriction of variation  
216 (especially deletion) on the introns of the sense genes in the overlapping areas, and  
217 thus such a kind of SAS gene overlap must have prevented the introns from being  
218 lost.

219 As for the other six introns, we did not find any ORFs on their corresponding  
220 complementary strands. Although we also experimentally examined whether their  
221 complementary strands (especially the areas overlapping with these introns) are  
222 transcribed, no transcripts were found (Additional file 2). Nevertheless, it is uncertain  
223 whether the corresponding complementary strands of these introns are resided by  
224 some unknown genomic functional elements which are not transcribed at all. If this is  
225 true, these introns are also retained by the same cause as the former two ones.

226 Certainly, it is also possible that the six introns are retained by other unknown reasons.  
227 We have also analyzed the intron regions of many intron-poor eukaryotes including  
228 *Microsporidia*, *Trichomonas*, *Spiroplasma*, but unfortunately did not find such  
229 sense-antisense gene overlaps as in *Giardia* (data not shown). But considering some  
230 genes overlap with the UTRs of the adjacent genes (as found in *Antonospora locustae*  
231 and *Encephalitozoon cuniculi* [25]), we can not obtain the UTRs information of those  
232 genes in current database, thus many of the overlaps might be able to be found out.  
233 More importantly, some introns might overlap with unknown genomic functional  
234 elements including non-coding and non-transcribed ones, since there are so huge  
235 remaining component of eukaryotic genomes, much of which was traditionally  
236 regarded as "junk" and is still undetermined. This might be the important cause for  
237 that few SAS gene overlaps in intron regions that can be identified at present.

238 Theoretically, overlapping with any genomic functional elements on either the  
239 same strand or the complementary one (namely, either same-strand overlapping or  
240 different-strand overlapping) can result in intron retention, as long as the introns are  
241 just in the overlapping areas. Therefore, since such overlapping structures are widely  
242 distributed in eukaryotes [26], it can be expected that quite a number of introns in  
243 diverse eukaryotes may also be retained due to this kind of "overlap constraint". We  
244 believe that more and more examples might be able to be found in diverse eukaryotes  
245 in the future. Conversely, such an intron retention phenomenon probably can provide  
246 a valuable clue to find new genomic functional elements – in the overlapping area  
247 with introns.

## 248 **Conclusions**

249 In conclusion, by investigating the extremely intron-poor eukaryote *Giardia*, we  
250 have revealed some interesting findings about the dynamic evolution of introns in the  
251 intron-poor eukaryotes: the pressure of intron loss may constantly exist in these  
252 eukaryotes, but new introns can still arise either in ancient genes or new-evolved  
253 genes, but only a few introns can be retained in the genome; the retention of the few  
254 introns is not caused by special features or functional constraint of the introns  
255 themselves but due to the reasons outside of the introns, and “overlap constraint”  
256 imposed by other genomic functional elements overlapping with the introns is at least  
257 an important one of the causes. First, our findings not only support the “intron-rich  
258 ancestor” theory, but also can explain why few eukaryotes were found to be  
259 completely intronless. Second, our finding may conversely provide a clue to find new  
260 genomic functional elements (which was probably traditionally regarded as “junk”  
261 and is still undetermined) in such kinds of overlap regions. Most importantly, our  
262 work implicates that “functional constraint” of introns is not necessarily directly  
263 associated with intron loss and gain, or that the real functions or the way of  
264 functioning of introns are probably still outside of our current knowledge. Therefore  
265 our work may be able to shed some new lights on the research of evolution and  
266 function of introns and genomes.

## 267 **Methods**

### 268 **Database and bioinformatics methods**

269 The template sequences for designing primers of *Giardia* genes were downloaded

270 from GiardiaDB (December 1, 2017 release) [27]. The software ORF Finder were  
271 used to predict the ORFs of the RACE products (see blow), then the predicted ORFs  
272 were used as queries to search their homologs with Blastp against the NCBI  
273 non-redundant protein sequences (nr) database. The program RNAfold web server  
274 was used to analyze the secondary structure of introns. The sequences of the four  
275 genes and their coding proteins, 2Fe-2S ferredoxin, 26S proteasome non-ATPase  
276 regulatory subunit 4, Dynein light chain, and Ribosomal Protein L7A from other  
277 organisms were identified and collected by Blastp searching against GenBank with  
278 *Giardia*'s corresponding sequences as queries. Protein alignments were generated  
279 with ClustalX 2 applying default alignment parameters. The introns in the genes were  
280 determined by comparing cDNA and gene sequences. The other four  
281 intron-containing genes with annotated as hypothetical protein also identified by  
282 sequence comparative analysis to determine whether they are *Giardia*-specific or not.

### 283 ***Giardia* cultures**

284 The cell line of WB isolate (assemblage A), namely WB clone C6 (ATCC 50803),  
285 was used in the study. Its cultures were routinely grown in filter-sterilized TYI-S-33  
286 medium supplemented with bovine bile in glass screw cap tubes at 37 °C and were  
287 sub-cultured every 3 to 4 days.

### 288 **RNA extraction**

289 *Giardia* total RNA was extracted and treated to remove any contaminated genomic  
290 DNA by RNAPrep Pure Cell/Bacteria Kit (TIANGEN) using about  $5 \times 10^6$  *Giardia*  
291 trophozoites that were harvested by ice-slush incubation and centrifuged at 6000g for

292 5 min according to the manufacturer's instructions. The quality and quantity of the  
293 RNA preparation were assessed with agarose gel electrophoresis and the absorption at  
294 260 and 280nm.

### 295 **Strand-specific RT-PCR**

296 First-strand cDNAs of the two antisense genes, GL50803-28204 and  
297 GL50803-20429, were synthesized from 500ng DNase-I treated total RNA per  
298 reaction at 54°C 30 min, 99°C 5 min, and 5°C 5 min with the specific antisense  
299 primer 4C and 9C respectively instead of the reverse primers in the kit, and then  
300 amplified with specific primers pairs of 4A/4S and 9A/9S by using RNA PCR Kit  
301 (AMV) Ver.3.0 ( Takara, Japan). The PCR conditions were as follows: 94°C for 30 s,  
302 followed by 30 cycles of 94°C for 30 s, 55°C for 30 s and 72°C for 45s. The PCR  
303 products were purified using the Wizard SV Gel and PCR Clean-Up System kit  
304 (Qiagen, Germany), and cloned into pMD-19T vectors from 35 ng purified PCR  
305 products using TaKaRa pMD-19T Vector Cloning Kit (TaKaRa, Japan) according to  
306 the manufacturer's instructions. Then, the ligation products were transformed into  
307 DH5 $\alpha$  Chemically Competent *E. coli*. Colony PCR with vector-specific primers  
308 provided in the kit was adopted to select colonies. These selected colonies were  
309 sequenced using vector-specific forward and reverse primers by Sangon Biology  
310 Company (Shanghai, China).

### 311 **Rapid amplification of cDNA ends**

312 The total RNA were processed using Poly(A) Polymerase(TaKaRa, Japan) to add a  
313 poly(A) tail at the 3'ends of the RNA before performing rapid amplification of their

314 cDNA 3'ends. We experimentally determined the 3'ends by using nested PCR primer  
315 (3R4O/3R4I and 3R9O/3R9I) according to the RNA PCR Kit (AMV) Ver.3.0 (Takara,  
316 Japan). 5'-RACE was performed by using a SMARTer RACE 5'/3'Kit (TaKaRa, Japan)  
317 with 500ng total RNA as the template and the gene-specific 5'-RACE primers 5R4  
318 and 5R9 for the two antisense genes, GL50803-28204 and GL50803-20429,  
319 according to the manufacturer's instructions. Both the 3'-RACE and 5'-RACE primers  
320 (Additional file 3) were designed based on the transcripts from the Strand-specific  
321 RT-PCR. The RACE-PCR products were analyzed by agarose gel electrophoresis and  
322 sequenced as described above.

### 323 **List of abbreviations**

324 LECA: last eukaryotic common ancestor.

325 SAS: sense-antisense.

326 RACE: rapid amplification of cDNA ends.

### 327 **Declarations**

#### 328 **Ethics approval and consent to participate**

329 Not applicable

#### 330 **Consent for publication**

331 Not applicable

#### 332 **Availability of data and materials**

333 All data generated or analysed during this study are included in this published  
334 article and its supplementary information files.

335 **Competing interests**

336 The authors declare that they have no competing interests.

337 **Funding**

338 This work was supported by the National Natural Science Foundation of China  
339 (NSFC) (grant numbers 31572256, 31772452, 31401972 and 31401973) and the  
340 Natural Science Foundation of Yunnan Province (grant number 2015FB181)

341 **Authors' contributions**

342 J.W. designed and supervised this study. M.X performed genetic characterization  
343 work. M.X., B.C., Q.Y., J.S., and Z.L. analyzed the data. M.X. and J.W. wrote the  
344 manuscript. All authors read and approved the final manuscript.

345 **Acknowledgements**

346 Not applicable

347

348 **References**

- 349 1. Csuros M, Rogozin IB, Koonin EV: A detailed history of intron-rich  
350 eukaryotic ancestors inferred from a global survey of 100 complete genomes.  
351 *PLoS Comput Biol* 2011, 7(9):e1002150.
- 352 2. Roy SW: Intron-rich ancestors. *Trends Genet* 2006, 22(9):468-471.
- 353 3. Pombert JF, Selman M, Burki F, Bardell FT, Farinelli L, Solter LF, Whitman  
354 DW, Weiss LM, Corradi N, Keeling PJ: Gain and loss of multiple functionally  
355 related, horizontally transferred genes in the reduced genomes of two  
356 microsporidian parasites. *Proceedings of the National Academy of Sciences of*



- 357            *the United States of America* 2012, 109(31):12638-12643.
- 358    4.        Stark MR, Dunn EA, Dunn WS, Grisdale CJ, Daniele AR, Halstead MR, Fast  
359            NM, Rader SD: Dramatically reduced spliceosome in *Cyanidioschyzon*  
360            *merolae*. *Proc Natl Acad Sci U S A* 2015, 112(11):E1191-1200.
- 361    5.        Shoguchi E, Shinzato C, Kawashima T, Gyoja F, Mungpakdee S, Koyanagi R,  
362            Takeuchi T, Hisata K, Tanaka M, Fujiwara M *et al*: Draft assembly of the  
363            *Symbiodinium minutum* nuclear genome reveals dinoflagellate gene structure.  
364            *Current biology : CB* 2013, 23(15):1399-1408.
- 365    6.        Roy SW, Gilbert W: The evolution of spliceosomal introns: patterns, puzzles  
366            and progress. *Nat Rev Genet* 2006, 7(3):211-221.
- 367    7.        Rodriguez-Trelles F, Tarrío R, Ayala FJ: Origins and evolution of  
368            spliceosomal introns. *Annu Rev Genet* 2006, 40:47-76.
- 369    8.        Irimia M, Roy SW: Origin of spliceosomal introns and alternative splicing.  
370            *Cold Spring Harb Perspect Biol* 2014, 6(6).
- 371    9.        Koonin EV: Intron-dominated genomes of early ancestors of eukaryotes. *J*  
372            *Hered* 2009, 100(5):618-623.
- 373    10.        Cuomo CA, Desjardins CA, Bakowski MA, Goldberg J, Ma AT, Becnel JJ,  
374            Didier ES, Fan L, Heiman DI, Levin JZ *et al*: Microsporidian genome analysis  
375            reveals evolutionary strategies for obligate intracellular growth. *Genome Res*  
376            2012, 22(12):2478-2488.
- 377    11.        Cohen NE, Shen R, Carmel L: The role of reverse transcriptase in intron gain  
378            and loss mechanisms. *Molecular biology and evolution* 2012, 29(1):179-186.

- 379 12. Mitrovich QM, Tuch BB, De La Vega FM, Guthrie C, Johnson AD: Evolution  
380 of yeast noncoding RNAs reveals an alternative mechanism for widespread  
381 intron loss. *Science* 2010, 330(6005):838-841.
- 382 13. Oswald A, Oates AC: Control of endogenous gene expression timing by  
383 introns. *Genome biology* 2011, 12(3):107.
- 384 14. Rearick D, Prakash A, McSweeney A, Shepard SS, Fedorova L, Fedorov A:  
385 Critical association of ncRNA with introns. *Nucleic Acids Res* 2011,  
386 39(6):2357-2366.
- 387 15. Chorev M, Carmel L: The function of introns. *Front Genet* 2012, 3:55.
- 388 16. Carmel L, Wolf YI, Rogozin IB, Koonin EV: Three distinct modes of intron  
389 dynamics in the evolution of eukaryotes. *Genome Res* 2007, 17(7):1034-1044.
- 390 17. Morrison HG, McArthur AG, Gillin FD, Aley SB, Adam RD, Olsen GJ, Best  
391 AA, Cande WZ, Chen F, Cipriano MJ *et al*: Genomic minimalism in the early  
392 diverging intestinal parasite *Giardia lamblia*. *Science* 2007,  
393 317(5846):1921-1926.
- 394 18. Kamikawa R, Inagaki Y, Hashimoto T: Secondary loss of a cis-spliced intron  
395 during the divergence of *Giardia intestinalis* assemblages. *BMC Res Notes*  
396 2014, 7:413.
- 397 19. Nixon JE, Wang A, Morrison HG, McArthur AG, Sogin ML, Loftus BJ,  
398 Samuelson J: A spliceosomal intron in *Giardia lamblia*. *Proc Natl Acad Sci U*  
399 *S A* 2002, 99(6):3701-3705.
- 400 20. Russell AG, Shutt TE, Watkins RF, Gray MW: An ancient spliceosomal intron

- 401 in the ribosomal protein L7a gene (Rpl7a) of *Giardia lamblia*. *BMC Evol Biol*  
402 2005, 5:45.
- 403 21. Roy SW, Hudson AJ, Joseph J, Yee J, Russell AG: Numerous fragmented  
404 spliceosomal introns, AT-AC splicing, and an unusual dynein gene expression  
405 pathway in *Giardia lamblia*. *Mol Biol Evol* 2012, 29(1):43-49.
- 406 22. Franzen O, Jerlstrom-Hultqvist J, Einarsson E, Ankarklev J, Ferella M,  
407 Andersson B, Svard SG: Transcriptome profiling of *Giardia intestinalis* using  
408 strand-specific RNA-seq. *PLoS Comput Biol* 2013, 9(3):e1003000.
- 409 23. Birkeland SR, Preheim SP, Davids BJ, Cipriano MJ, Palm D, Reiner DS,  
410 Svard SG, Gillin FD, McArthur AG: Transcriptome analyses of the *Giardia*  
411 *lamblia* life cycle. *Molecular and biochemical parasitology* 2010,  
412 174(1):62-65.
- 413 24. Chen XS, White WT, Collins LJ, Penny D: Computational identification of  
414 four spliceosomal snRNAs from the deep-branching eukaryote *Giardia*  
415 *intestinalis*. *PLoS One* 2008, 3(8):e3106.
- 416 25. Corradi N, Gangaeva A, Keeling PJ: Comparative profiling of overlapping  
417 transcription in the compacted genomes of microsporidia *Antonospora*  
418 *locustae* and *Encephalitozoon cuniculi*. *Genomics* 2008, 91(4):388-393.
- 419 26. Kumar A: An overview of nested genes in eukaryotic genomes. *Eukaryot Cell*  
420 2009, 8(9):1321-1329.
- 421 27. Shabalina SA, Ogurtsov AY, Kondrashov VA, Kondrashov AS: Selective  
422 constraint in intergenic regions of human and mouse genomes. *Trends In*

423 *Genetics* 2001, 17(7):373-376.

424

425 **Table 1. The integrated information of the eight spliceosome-mediated cis-spliced**  
 426 **introns and their host genes and complementary strands.**

| Intron-containing gene |                                                |                | Intron         |           | Complementary strand                   |
|------------------------|------------------------------------------------|----------------|----------------|-----------|----------------------------------------|
| Gene ID                | Product                                        | Age            | Age            | Size (bp) |                                        |
| GL50803-27266          | 2Fe-2S ferredoxin                              |                | relatively new | 35        | No ORF, no transcripts detected        |
| GL50803-15604          | 26S proteasome non-ATPase regulatory subunit 4 | ancient        | ancient        | 29        | No ORF, no transcripts detected        |
| GL50803-15124          | Dynein light chain                             |                |                | 32        | No ORF, no transcripts detected        |
| GL50803-17244          | Ribosomal Protein L7A                          |                |                | 109       | <b>Antisense gene with transcripts</b> |
| GL50803-37070          | Hypothetical protein                           |                |                | 41        | <b>Antisense gene with transcripts</b> |
| GL50803-35332          | Hypothetical protein                           | relatively new | relatively new | 220       | No ORF, no transcripts detected        |
| GL50803-15525          | Hypothetical protein                           |                |                | 33        | No ORF, no transcripts detected        |
| GL50803-86945          | Hypothetical protein                           |                |                | 36        | No ORF, no transcripts detected        |

427

## 428 Figure Captions

429 **Fig 1. Results of strand-specific RT-PCR and sequencing of the two antisense**  
 430 **genes, and the schematic diagram of this two SAS gene pairs.**

431 **A.** Lane 1, Strand-specific RT-PCR product of the GL50803-20429; Lane 4, the Strand-specific  
 432 RT-PCR product of the GL50803-28204; Lane 2 and lane 3, negative controls (with no RTase)  
 433 corresponding to lane 1 and lane 4, respectively; M, molecular markers. **B.** Nucleotide sequence of  
 434 GL50803-28204 gene acquired by Strand-specific RT-PCR and sequencing. The locations of the  
 435 primers are underlined. **C.** Nucleotide sequence of GL50803-20429 gene acquired by Strand-  
 436 specific RT-PCR and sequencing. **D.** Schematic diagram of the two SAS gene pairs. The sequence  
 437 lengths of GL50803-28204 and GL50803-20429 are according to the Strand-specific RT-PCR  
 438 products, and the lengths of GL50803-37070 and GL50803-17244 are based on the GiardiaDB

439 database. Arrow represents the orientation of transcription; and the dashed box and solid lines

440 represent introns and exons, respectively.

441

442 **Additional files**

443 **Additional file 1:** The conservative analysis of Giardia's introns among diverse

444 eukaryotes

445 **Additional file 2:** Results of strand-specific RT-PCR of the complementary areas of

446 the other six introns of *G. lamblia*.

447 **Additional file 3:** The primers designed for the strand-specific RT-PCR and RACE of

448 the complementary areas of the eight introns of *G. lamblia*.

**A**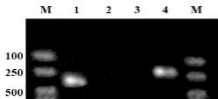**B****GL50803-28204:**

ATGCCGATAAAGATAAAGGACGCGCGAAAG  
 ACGCTCTTGGGGGAGATGCGTGCAACGGGA  
 GCGTGCTTCTCTGTCTTTCTGCGTGTTAGACG  
 TCGGGTGGAACGAGCAATGAAACATACGCCA  
 TCTCTGGATTTTTTTCTTTGGCGGCTTTATGG  
CAGGCTACCGATTACC

**C****GL50803-20429:**

AAAGGTGGGCTTGTCCTCTGGGTTACAGTCCGGTGAAGCAGACGCTGGTTCGTCTTCTTC  
 AGATGGACGAGCTTGCCAGATCGCCCTTA GTGCGAACGATGGCGTACGGGACGCC  
 ATCTTGTGACAGAGTGTGGGAAGCCAAAGTACGAGCTGTGGGTGAGTTGTCAGGTGA  
 ACAGCGAAGTCCACCCGCTGACAACACACAACCCGCAATCAGAGGTGTGTGCGGTGTCAG  
 CGGACGGCTCCTCGCGCATAAGAACATACTTCAAGGGGGTTCGACATCATTGCAATCA

**D****GL50803-37070:**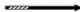**GL50803-28204:**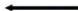**GL50803-17244:**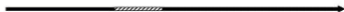**GL50803-20429:**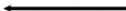

Source: https://www.biorxiv.org/content/10.1101/333310v1.full.pdf
